# Supplementary material for: An Inverted-Sandwich Diuranium μ-η5:η5-Cyclo-P5 Complex Supported by U-P5 δ-Bonding
Source: PubMed Central journal article supplement (PMC4517156; doi:10.1002/anie.201501728), 2015-04-27
Supplement: anie0054-7068-sd1.pdf [file anie0054-7068-sd1.pdf]

## Supporting Information

German Edition: DOI:

### **An Inverted-Sandwich Diuranium $\mu$ - $\eta^5$ : $\eta^5$ -Cyclo- $P_5$ Complex Supported by U- $P_5$ $\delta$ -Bonding\*\***

*Benedict M. Gardner, Floriana Tuna, Eric J. L. McInnes, Jonathan McMaster, William Lewis,  
Alexander J. Blake, and Stephen T. Liddle\**

anie\_201501728\_sm\_miscellaneous\_information.pdf

## Experimental

### *General*

All manipulations were carried out using Schlenk techniques, or an MBraun UniLab glovebox, under an atmosphere of dry nitrogen. Solvents were dried by passage through activated alumina towers and degassed before use or were distilled from calcium hydride. All solvents were stored over potassium mirrors except ethers which were stored over activated 4 Å sieves. Deuterated solvent was distilled from potassium, degassed by three freeze-pump-thaw cycles and stored under nitrogen.  $[\text{U}(\text{Tren}^{\text{TIPS}})]$  [**1** =  $\text{Tren}^{\text{TIPS}} = \{\text{N}(\text{CH}_2\text{CH}_2\text{NSiPr}^i_3)_3\}$ ] was prepared as described previously.<sup>1</sup>  $^1\text{H}$  and  $^{29}\text{Si}$  NMR spectra were recorded on a Bruker 400 spectrometer operating at 400.2 and 79.5 MHz respectively; chemical shifts are quoted in ppm and are relative to TMS ( $^1\text{H}$ ,  $^{29}\text{Si}$ ). FTIR spectra were recorded on a Bruker Tensor 27 spectrometer. UV/Vis/NIR spectra were recorded on a Perkin Elmer Lambda 750 spectrometer. Data were collected in 1mm path length cuvettes loaded in an MBraun UniLab glovebox and were run versus the appropriate reference solvent. Static variable-temperature magnetic moment data were recorded in an applied dc field of 0.1 T on a Quantum Design MPMS XL7 superconducting quantum interference device (SQUID) magnetometer using doubly recrystallised powdered samples. Samples were carefully checked for purity and data reproducibility between several independently prepared batches for each compound examined. Care was taken to ensure complete thermalisation of the sample before each data point was measured and samples were immobilised in an eicosane matrix to prevent sample reorientation during measurements. Diamagnetic corrections were applied for **2** using tabulated Pascal constants and measurements were corrected for the effect of the blank sample holders (flame sealed Wilmad NMR tube and straw) and eicosane matrix. X-band EPR data were acquired on a Bruker EMX spectrometer. CHN microanalyses were carried out by Tong Liu at the University of Nottingham. CCDC deposition number for **2** is 1049738.

## Preparation of [ $\{U(\text{Tren}^{\text{TIPS}})\}_2(\mu\text{-}\eta^5\text{:}\eta^5\text{-P}_5)$ ] (**2**)

THF (20 ml) was added to a cold ( $-78\text{ }^\circ\text{C}$ ) mixture of [ $U(\text{Tren}^{\text{TIPS}})$ ] (**1**) (0.51 g, 0.6 mmol) and  $P_4$  (19 mg, 0.15 mmol). The dark blue-green suspension was allowed to warm to ambient temperature whilst stirring and the dark mixture produced was stirred at room temperature for a further 16 hours. The dark brown solution was reduced to dryness *in vacuo* to afford a sticky dark brown solid, which was extracted into toluene (10 ml), filtered and reduced in volume to *ca.* 2 ml. Storage at  $5\text{ }^\circ\text{C}$  for 72 hours yielded brown crystals of **2**, which were isolated by filtration, washed with hexanes ( $3 \times 1\text{ ml}$ ) and dried *in vacuo* for 30 minutes. Yield: 60 mg (25% based on P).  $^1\text{H}$  NMR ( $\text{C}_6\text{D}_6$ , 298 K):  $-32.32$  (s, 8H,  $\text{CH}_2$ ),  $-22.21$  (s, 8H,  $\text{CH}_2$ ),  $-12.68$  (s, 8H,  $\text{CH}_2$ ),  $5.21$  (s, 54H, Me),  $6.04$  (s, 18H, CH),  $8.86$  (s, 54H, Me) ppm.  $^{29}\text{Si}\{^1\text{H}\}$  NMR ( $\text{C}_6\text{D}_6$ , 298 K):  $-96.87$  ppm.  $^{31}\text{P}$  signal not observed.  $\mu_{\text{eff}}$  (Evans method,  $\text{C}_6\text{D}_6$ , 298 K):  $4.09\ \mu_{\text{B}}$ . FTIR (Nujol):  $1631.54$  (m),  $1598.74$  (m),  $1556.95$  (m),  $930.86$  (s),  $670.39$  (s),  $576.97$  (m),  $558.70$  (m),  $541.05$  (w),  $472.13$  (w),  $416.37$  (w)  $\text{cm}^{-1}$ . Anal. calc'd for  $\text{C}_{66}\text{H}_{150}\text{N}_8\text{P}_5\text{Si}_6\text{U}_2$ : C 42.74%; H 8.15%; N 6.04%. Found: C 42.52%; H 8.29%; N 5.77%.

## UV/Vis/NIR Spectra

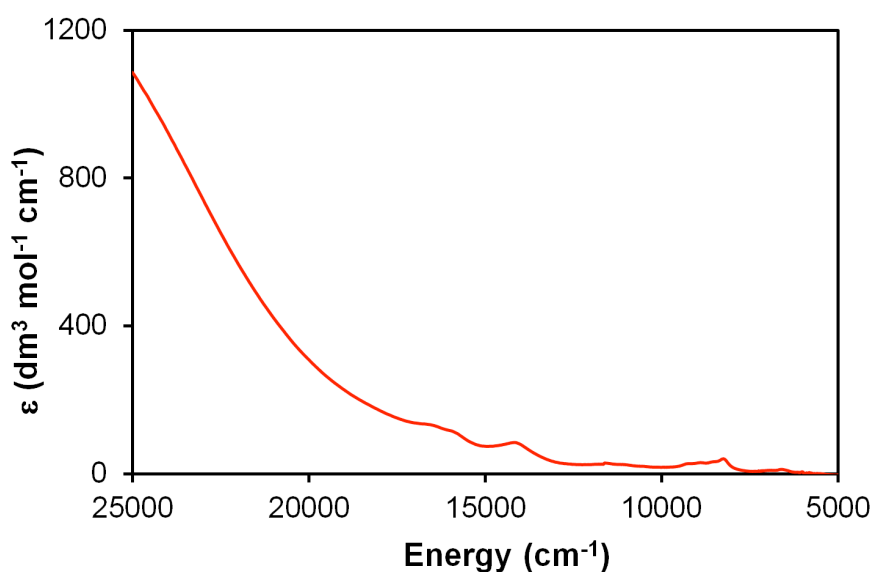

**Figure S1.** UV/Vis/NIR spectrum of **2** as a 20 mM solution in toluene.

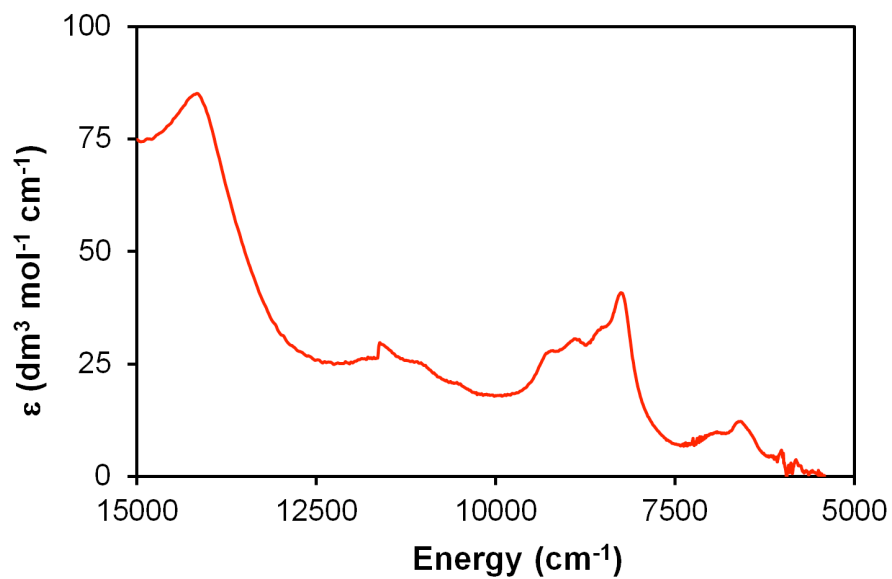

**Figure S2.** Zoom-in of the 5000-15000  $\text{cm}^{-1}$  region of the UV/Vis/NIR spectrum of **2**.

### Magnetism Data

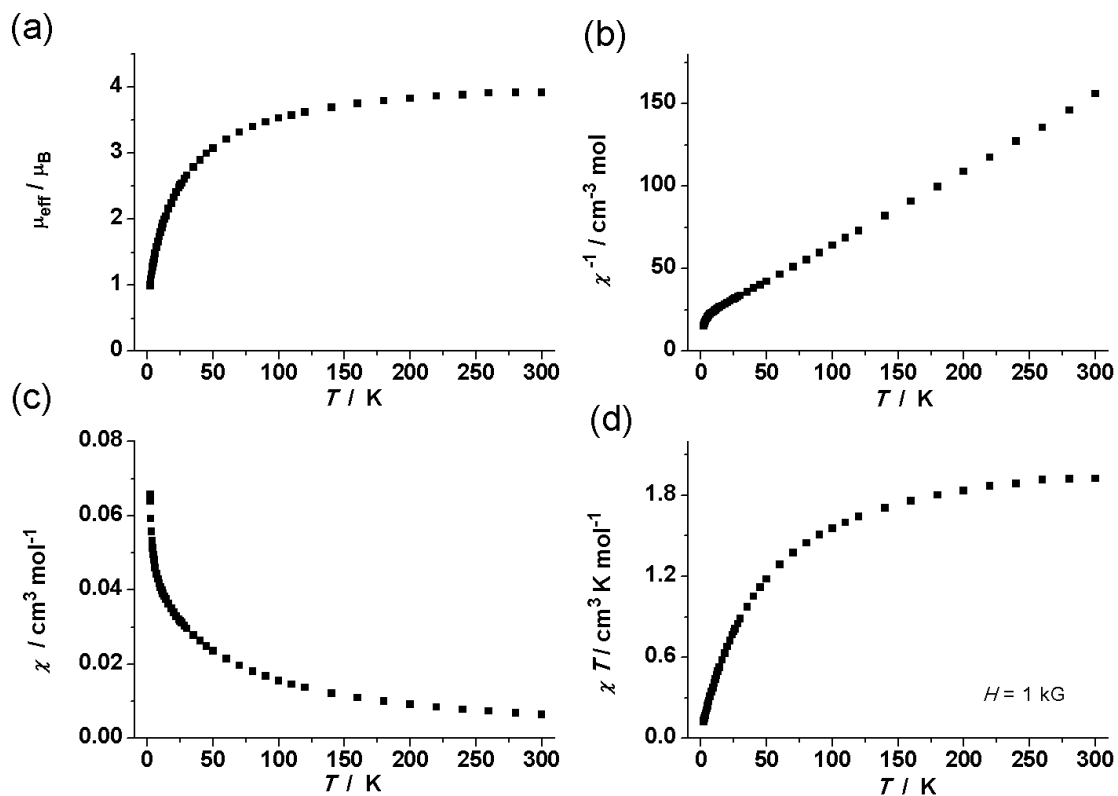

**Figure S3.** Variable-temperature SQUID data for: (a)  $\mu_{\text{eff}}$  vs  $T$ , (b)  $1/\chi$  vs  $T$ , (c)  $\chi$  vs  $T$ , and (d)  $\chi T$  vs  $T$  for **2**.

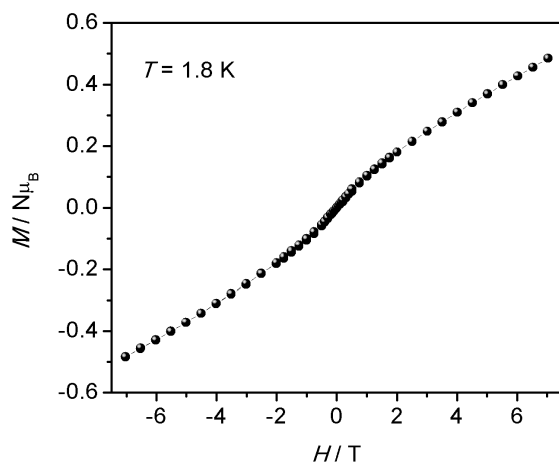

**Figure S4.** M vs H data for **2**.

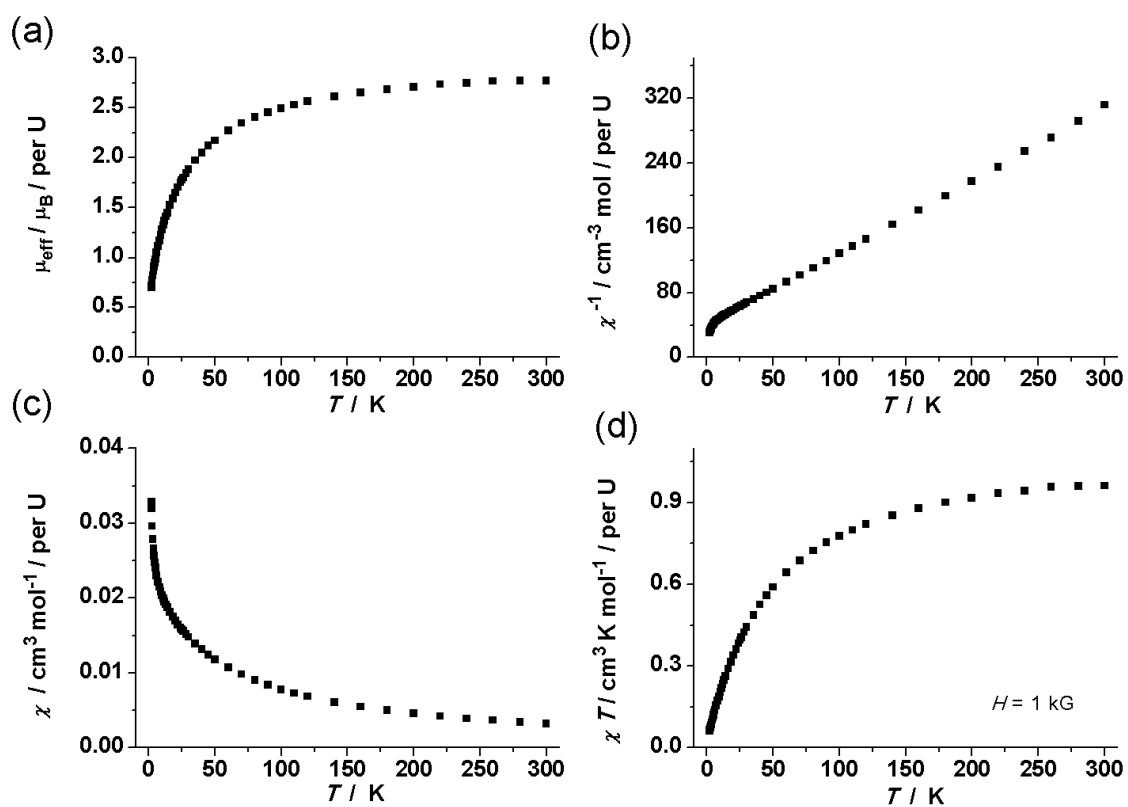

**Figure S5.** Variable-temperature SQUID data for: (a)  $\mu_{\text{eff}}$  vs  $T$ , (b)  $1/\chi$  vs  $T$ , (c)  $\chi$  vs  $T$ , and (d)  $\chi T$  vs  $T$  per uranium ion in **2**.

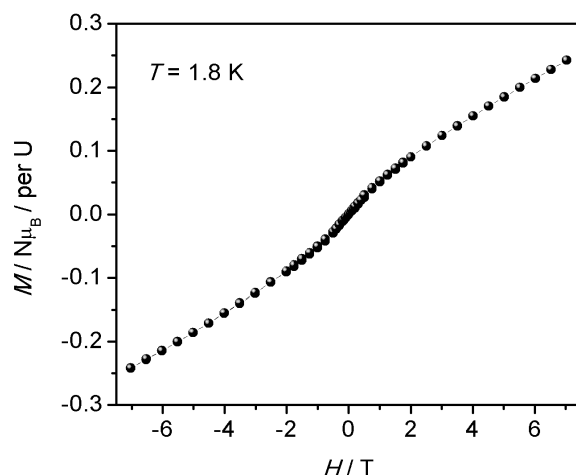

**Figure S6.** M vs H data per uranium ion in **2**.

## Density Functional Theory Calculations

### *General*

Unrestricted geometry optimisations were performed for the full model of **2** using coordinates derived from the X-ray crystal structure. No constraints were imposed on the structure during the geometry optimisation. The calculations were performed using the Amsterdam Density Functional (ADF) suite version 2012.01.<sup>2,3</sup> The DFT geometry optimisations employed Slater type orbital (STO) triple- $\zeta$ -plus polarisation all-electron basis sets (from the ZORA/TZP database of the ADF suite). Scalar relativistic approaches were used within the ZORA Hamiltonian for the inclusion of relativistic effects and the local density approximation (LDA) with the correlation potential due to Vosko et al<sup>4</sup> was used in all of the calculations. Gradient corrections were performed using the functionals of Becke<sup>5</sup> and Perdew.<sup>6</sup> MOLEKEL<sup>7</sup> was used to prepare the three-dimensional plot of the electron density.

### *Final Coordinates and Single Point Energy of 2 After Geometry Optimisation*

|     |           |           |           |
|-----|-----------|-----------|-----------|
| 1.C | -4.873949 | -0.872082 | -6.393979 |
| 2.C | -1.715692 | 0.929753  | -6.319785 |

|      |           |           |           |
|------|-----------|-----------|-----------|
| 3.C  | -1.731897 | -0.384809 | -5.512403 |
| 4.C  | -4.785184 | -0.252130 | -4.980837 |
| 5.C  | -0.306261 | -0.720190 | -5.042595 |
| 6.C  | 3.646240  | 0.566301  | -4.902049 |
| 7.C  | 3.876468  | -1.880316 | -4.314423 |
| 8.C  | -5.996242 | -0.720791 | -4.148071 |
| 9.C  | -3.196339 | -3.367817 | -4.334187 |
| 10.C | 3.571334  | -0.470942 | -3.764027 |
| 11.C | 7.036930  | -0.024608 | -3.603203 |
| 12.C | -3.190274 | 2.127722  | -3.444828 |
| 13.C | -2.084478 | 6.428338  | -2.887117 |
| 14.C | -2.908923 | -2.241538 | -3.318615 |
| 15.C | 0.138707  | 3.737366  | -3.400909 |
| 16.C | -4.567543 | 2.530346  | -2.934722 |
| 17.C | 4.998898  | 2.776996  | -2.587717 |
| 18.C | 1.556956  | 5.563814  | -2.458327 |
| 19.C | 6.408040  | -0.428272 | -2.250361 |
| 20.C | 1.375890  | -4.179421 | -2.315729 |
| 21.C | -0.317568 | -5.986188 | -1.944644 |
| 22.C | 0.631403  | 4.380674  | -2.090212 |
| 23.C | -3.704699 | -2.472738 | -2.022869 |
| 24.C | -1.679467 | 6.448255  | -1.397096 |
| 25.C | -0.947573 | 7.775012  | -1.092419 |
| 26.C | 4.233046  | 1.809835  | -1.655395 |
| 27.C | 0.289090  | -4.692239 | -1.353682 |
| 28.C | -4.277507 | 4.051367  | -1.000489 |
| 29.C | 7.260897  | 0.158601  | -1.104260 |
| 30.C | 4.361792  | -2.535284 | -0.970501 |
| 31.C | 2.974074  | -6.702158 | -0.338382 |
| 32.C | -5.580699 | 1.956447  | -0.751143 |
| 33.C | -5.072685 | 0.573054  | -0.364440 |
| 34.C | 4.537300  | 2.211174  | -0.199389 |
| 35.C | -3.190268 | 4.031797  | 0.063914  |
| 36.C | 1.048172  | -7.789485 | 0.862820  |
| 37.C | 5.299518  | -2.750329 | 0.208783  |
| 38.C | 1.880970  | -6.494415 | 0.732706  |
| 39.C | -1.977467 | -5.731302 | 1.105564  |
| 40.C | 1.418870  | 5.890713  | 0.998777  |
| 41.C | 0.080724  | 5.127107  | 0.947763  |
| 42.C | -0.777129 | -4.904185 | 1.608289  |
| 43.C | -5.433423 | -2.328023 | 1.474211  |
| 44.C | 4.011653  | -3.950121 | 1.955826  |
| 45.C | -0.889790 | 5.692200  | 2.006422  |
| 46.C | 2.538822  | -3.791582 | 2.313557  |
| 47.C | -4.365001 | -1.636775 | 2.348024  |
| 48.C | 4.543569  | -0.412720 | 2.406235  |
| 49.C | 5.135257  | -1.813460 | 2.497527  |
| 50.C | -6.203384 | 0.993134  | 2.601690  |
| 51.C | -6.263175 | 2.511539  | 2.877731  |
| 52.C | -0.503486 | -5.219291 | 3.094410  |

|       |           |           |           |
|-------|-----------|-----------|-----------|
| 53.C  | -2.711247 | 2.463843  | 3.346057  |
| 54.C  | -3.171882 | 1.012606  | 3.574202  |
| 55.C  | 1.967600  | 2.828467  | 3.764350  |
| 56.C  | -4.324166 | -2.288800 | 3.745039  |
| 57.C  | -6.975892 | 0.246264  | 3.712265  |
| 58.C  | 4.419359  | 2.499646  | 4.235849  |
| 59.C  | 0.407891  | -1.718992 | 4.561381  |
| 60.C  | 2.996130  | 1.987311  | 4.539318  |
| 61.C  | 0.914360  | -0.296641 | 4.855418  |
| 62.C  | -3.679698 | 0.883514  | 5.029313  |
| 63.C  | 3.994875  | -0.754063 | 5.592144  |
| 64.C  | 3.678720  | -2.224295 | 5.936212  |
| 65.C  | 0.615578  | 0.088199  | 6.319848  |
| 66.C  | 4.214421  | 0.035364  | 6.902648  |
| 67.H  | -5.860294 | -0.659044 | -6.842017 |
| 68.H  | -4.112243 | -0.475296 | -7.078166 |
| 69.H  | -1.060258 | 0.832873  | -7.202303 |
| 70.H  | -2.710564 | 1.224803  | -6.685231 |
| 71.H  | -4.760876 | -1.966503 | -6.371177 |
| 72.H  | -2.048539 | -1.186138 | -6.208857 |
| 73.H  | -1.316740 | 1.761335  | -5.719579 |
| 74.H  | 0.395107  | -0.727898 | -5.894629 |
| 75.H  | 3.040438  | 0.225210  | -5.758852 |
| 76.H  | -4.891004 | 0.839559  | -5.123597 |
| 77.H  | 3.289371  | -2.066066 | -5.229444 |
| 78.H  | 4.671827  | 0.718379  | -5.272151 |
| 79.H  | -6.943231 | -0.415198 | -4.626058 |
| 80.H  | -2.603826 | -3.266473 | -5.254795 |
| 81.H  | 4.936407  | -2.006466 | -4.584439 |
| 82.H  | -3.172712 | 2.139826  | -4.544291 |
| 83.H  | -4.257816 | -3.397730 | -4.623215 |
| 84.H  | 6.546496  | -0.511437 | -4.457531 |
| 85.H  | -0.243906 | -1.702624 | -4.554514 |
| 86.H  | 3.247348  | 1.543320  | -4.595777 |
| 87.H  | -6.019345 | -1.817819 | -4.064254 |
| 88.H  | 0.061310  | 0.028869  | -4.324216 |
| 89.H  | 3.614209  | -2.672197 | -3.601797 |
| 90.H  | -1.208646 | 6.554367  | -3.540591 |
| 91.H  | 8.102738  | -0.312077 | -3.628739 |
| 92.H  | 6.992450  | 1.061962  | -3.769752 |
| 93.H  | -0.487457 | 4.426528  | -3.984705 |
| 94.H  | -2.954634 | -4.350387 | -3.895408 |
| 95.H  | -2.776037 | 7.258351  | -3.113768 |
| 96.H  | 0.998831  | 3.463095  | -4.033777 |
| 97.H  | 4.836794  | 2.580248  | -3.654143 |
| 98.H  | -4.920443 | 3.468646  | -3.402061 |
| 99.H  | -5.999392 | -0.319609 | -3.124682 |
| 100.H | 2.520108  | -0.482421 | -3.421001 |
| 101.H | -2.476030 | 2.913035  | -3.141979 |
| 102.H | -2.579642 | 5.494295  | -3.190688 |



|       |           |           |           |
|-------|-----------|-----------|-----------|
| 103.H | -5.288505 | 1.743687  | -3.185027 |
| 104.H | 1.028368  | 6.306303  | -3.074749 |
| 105.H | 0.967234  | -4.080551 | -3.335279 |
| 106.H | -0.748170 | -5.778205 | -2.938458 |
| 107.H | 2.407388  | 5.199465  | -3.058022 |
| 108.H | -1.840422 | -2.316904 | -3.044570 |
| 109.H | -0.427106 | 2.813447  | -3.232691 |
| 110.H | 2.228648  | -4.870655 | -2.374699 |
| 111.H | 6.083012  | 2.734700  | -2.402653 |
| 112.H | 4.682711  | 3.814646  | -2.389988 |
| 113.H | 6.503619  | -1.527529 | -2.189474 |
| 114.H | 0.451605  | -6.759863 | -2.087573 |
| 115.H | -1.564271 | 8.632599  | -1.414254 |
| 116.H | -4.789176 | -2.378638 | -2.174862 |
| 117.H | 0.010587  | 7.848575  | -1.627696 |
| 118.H | -3.936820 | 4.658146  | -1.847604 |
| 119.H | 4.904611  | -2.705693 | -1.911067 |
| 120.H | 3.152861  | 1.979173  | -1.825286 |
| 121.H | 1.754145  | -3.189336 | -2.031289 |
| 122.H | 2.535090  | -6.974574 | -1.309796 |
| 123.H | 1.968143  | 6.088025  | -1.587292 |
| 124.H | -1.111943 | -6.420157 | -1.325494 |
| 125.H | -6.494696 | 1.901762  | -1.372153 |
| 126.H | -3.519951 | -3.487074 | -1.632067 |
| 127.H | -2.615862 | 6.478773  | -0.811499 |
| 128.H | 1.253482  | 3.629248  | -1.567926 |
| 129.H | 8.288386  | -0.242697 | -1.138338 |
| 130.H | 7.341426  | 1.252411  | -1.186780 |
| 131.H | -3.415166 | -1.774267 | -1.223656 |
| 132.H | -4.774365 | 0.049614  | -1.287683 |
| 133.H | -0.514300 | -3.930927 | -1.341297 |
| 134.H | 3.586013  | -3.315963 | -0.937055 |
| 135.H | -5.216799 | 4.498267  | -0.622689 |
| 136.H | 3.593652  | -5.809401 | -0.506304 |
| 137.H | 3.650871  | -7.524630 | -0.049686 |
| 138.H | -0.740226 | 7.905147  | -0.021255 |
| 139.H | 0.479935  | -8.006742 | -0.053593 |
| 140.H | 6.854656  | -0.058732 | -0.105415 |
| 141.H | -5.830008 | 2.511731  | 0.160714  |
| 142.H | 4.296347  | 3.275949  | -0.042845 |
| 143.H | -2.317120 | -5.408540 | 0.112079  |
| 144.H | 1.712082  | -8.652914 | 1.043655  |
| 145.H | 5.823611  | -3.722604 | 0.146701  |
| 146.H | 5.599705  | 2.078490  | 0.048195  |
| 147.H | -5.895494 | -0.026384 | 0.051380  |
| 148.H | 6.059871  | -1.960684 | 0.209527  |
| 149.H | -3.079116 | 5.035124  | 0.498438  |
| 150.H | 2.198758  | 5.395494  | 0.403965  |
| 151.H | 1.329767  | 6.929629  | 0.645531  |
| 152.H | 3.939198  | 1.650197  | 0.528499  |

|       |           |           |          |
|-------|-----------|-----------|----------|
| 153.H | -1.756897 | -6.808655 | 1.053661 |
| 154.H | -5.347082 | -2.051842 | 0.415966 |
| 155.H | -3.533758 | 3.392431  | 0.892301 |
| 156.H | 0.332820  | -7.747526 | 1.695278 |
| 157.H | 4.105704  | -4.699395 | 1.161279 |
| 158.H | 2.400907  | -6.372002 | 1.700429 |
| 159.H | 0.304599  | 4.085266  | 1.243381 |
| 160.H | -2.831205 | -5.610138 | 1.794488 |
| 161.H | -1.261764 | 6.694944  | 1.743895 |
| 162.H | -5.321113 | -3.423875 | 1.528803 |
| 163.H | 4.752216  | -0.024212 | 1.394688 |
| 164.H | -1.086776 | -3.842129 | 1.565554 |
| 165.H | 1.785120  | 5.933220  | 2.038838 |
| 166.H | -6.769200 | 0.815232  | 1.669018 |
| 167.H | -6.458566 | -2.095329 | 1.801731 |
| 168.H | -3.387630 | -1.848440 | 1.873615 |
| 169.H | -1.758648 | 5.041909  | 2.165512 |
| 170.H | -5.710711 | 3.109525  | 2.138464 |
| 171.H | -2.214365 | 2.598876  | 2.376776 |
| 172.H | 6.235564  | -1.801868 | 2.388300 |
| 173.H | 4.610875  | -4.297424 | 2.818487 |
| 174.H | 2.173484  | -4.700550 | 2.812516 |
| 175.H | 2.074400  | 2.683979  | 2.677844 |
| 176.H | -0.378099 | 5.786081  | 2.979163 |
| 177.H | -0.088727 | -6.229156 | 3.239750 |
| 178.H | -7.307841 | 2.866969  | 2.876087 |
| 179.H | 2.456791  | -2.995003 | 3.071603 |
| 180.H | 4.638229  | 2.453829  | 3.158082 |
| 181.H | 5.073889  | 0.269586  | 3.085640 |
| 182.H | -3.549695 | 3.172452  | 3.405263 |
| 183.H | -2.273520 | 0.372451  | 3.483946 |
| 184.H | -1.441063 | -5.172529 | 3.673818 |
| 185.H | 0.188832  | -4.501851 | 3.551048 |
| 186.H | 4.903845  | -2.238604 | 3.480830 |
| 187.H | 0.471405  | -1.973412 | 3.492719 |
| 188.H | -7.072563 | -0.828463 | 3.507019 |
| 189.H | 2.109383  | 3.903896  | 3.966603 |
| 190.H | -4.237321 | -3.384149 | 3.645325 |
| 191.H | -5.843460 | 2.755211  | 3.865104 |
| 192.H | -1.981671 | 2.758669  | 4.118418 |
| 193.H | 0.931694  | 2.576096  | 4.029701 |
| 194.H | -7.996536 | 0.655514  | 3.807974 |
| 195.H | 0.321441  | 0.382371  | 4.215284 |
| 196.H | 4.521849  | 3.556430  | 4.535466 |
| 197.H | -3.461984 | -1.949834 | 4.335984 |
| 198.H | -5.234293 | -2.090373 | 4.331645 |
| 199.H | -0.653750 | -1.816405 | 4.842180 |
| 200.H | 5.203122  | 1.935228  | 4.762986 |
| 201.H | -6.491754 | 0.355237  | 4.694132 |
| 202.H | 0.961427  | -2.485114 | 5.122569 |

|        |           |           |           |
|--------|-----------|-----------|-----------|
| 203.H  | -4.513329 | 1.574816  | 5.224844  |
| 204.H  | 3.507555  | -2.849439 | 5.048095  |
| 205.H  | -4.021301 | -0.126811 | 5.285810  |
| 206.H  | 4.968232  | -0.744454 | 5.067620  |
| 207.H  | 2.816725  | 2.157124  | 5.619246  |
| 208.H  | -2.873692 | 1.149498  | 5.732658  |
| 209.H  | -0.464701 | 0.005160  | 6.525169  |
| 210.H  | 0.914377  | 1.120198  | 6.553623  |
| 211.H  | 4.505547  | -2.680455 | 6.507439  |
| 212.H  | 2.776649  | -2.300128 | 6.562116  |
| 213.H  | 4.572788  | 1.058197  | 6.724200  |
| 214.H  | 1.129619  | -0.576221 | 7.031355  |
| 215.H  | 4.968240  | -0.470921 | 7.530807  |
| 216.H  | 3.293465  | 0.106850  | 7.500171  |
| 217.N  | -2.795804 | 0.801918  | -2.880011 |
| 218.N  | -4.495161 | 2.663871  | -1.463615 |
| 219.N  | 3.747013  | -1.177047 | -0.896560 |
| 220.N  | -1.917228 | 3.508508  | -0.514135 |
| 221.N  | -3.917068 | 0.695500  | 0.568658  |
| 222.N  | 1.752881  | -3.443459 | 1.095970  |
| 223.N  | 4.505940  | -2.650581 | 1.453196  |
| 224.N  | 3.073305  | -0.453533 | 2.669113  |
| 225.Si | -3.053965 | -0.493346 | -4.105460 |
| 226.Si | 4.494397  | -0.051824 | -2.110014 |
| 227.Si | -0.726032 | 4.850050  | -0.795103 |
| 228.Si | 0.812822  | -4.872496 | 0.496996  |
| 229.Si | -4.404784 | 0.301285  | 2.269034  |
| 230.Si | 2.731848  | 0.080813  | 4.355360  |
| 231.P  | 0.552513  | 0.794034  | -1.676350 |
| 232.P  | -0.135084 | -1.238995 | -1.267988 |
| 233.P  | 1.218310  | 1.472055  | 0.298438  |
| 234.P  | -0.950156 | -1.206513 | 0.732318  |
| 235.P  | -0.310609 | 0.650619  | 1.624789  |
| 236.U  | -2.133132 | 1.256958  | -0.745713 |
| 237.U  | 2.157999  | -1.223911 | 0.727562  |

Energy: -1274.50108063 eV

## References

1. D. M. King, F. Tuna, E. J. L. McInnes, J. McMaster, W. Lewis, A. J. Blake, S. T. Liddle, *Science* **2012**, *337*, 717.
2. C. Fonseca Guerra, J. G. Snijders, G. te Velde E. J. Baerends, *Theor. Chem. Acc.* **1998**, *99*, 391.
3. G. te Velde, F. M. Bickelhaupt, S. J. A. van Gisbergen, C. Fonseca Guerra, E. J. Baerends, J. G. Snijders T. Ziegler, *J. Comput. Chem.* **2001**, *22*, 931.

4. S. H. Vosko, L. Wilk, M. Nusair, *Can. J. Phys.* **1980**, 58, 1200.
5. A. D. Becke, *Phys. Rev. A.* **1988**, 38, 3098.
6. J. P. Perdew, *Phys. Rev. B.* **1986**, 33, 8822.
7. S. Portmann, H. P. Luthi, *Chimia* **2000**, 54, 766.
